# Supplementary material for: Protein Phosphatases Type 2C Group A Interact with and Regulate the Stability of ACC Synthase 7 in Arabidopsis
Source: PubMed Central journal article supplement (PMC7227406; doi:10.3390/cells9040978), 2020-04-15
Supplement: cells-09-00978-s001.pdf [file cells-09-00978-s001.pdf]

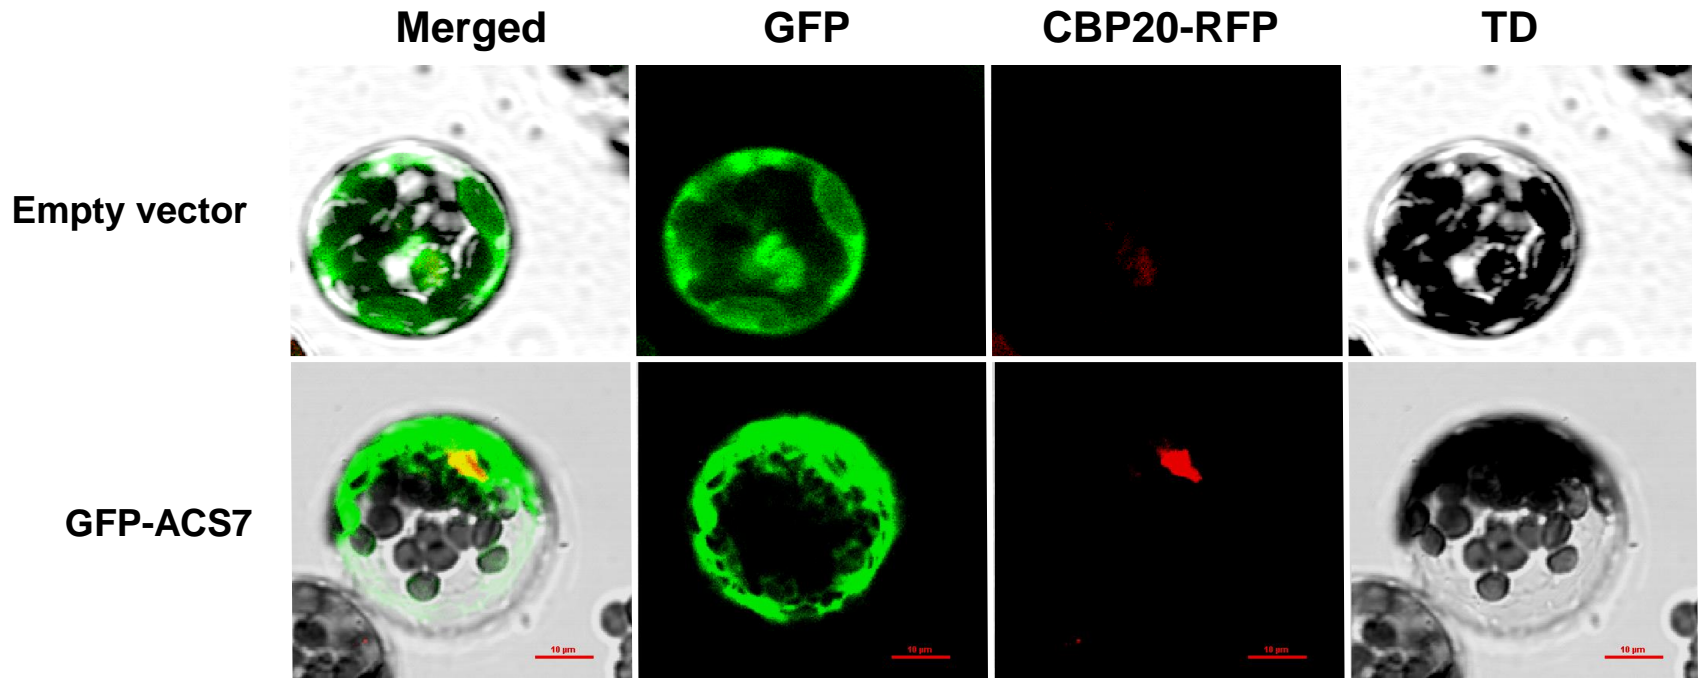

**Supplementary Figure S1. Subcellular localization of the ACS7 protein in the *Arabidopsis* protoplasts.**

Microscopy images show nuclear localization of the GFP-ACS7 fusions in protoplasts isolated from leaves of *Arabidopsis* wild type plants. CBP20-RFP was used as a marker of nuclear localization. Empty pSITE-2CA was used as negative control. Scale bar, 10  $\mu$ m.

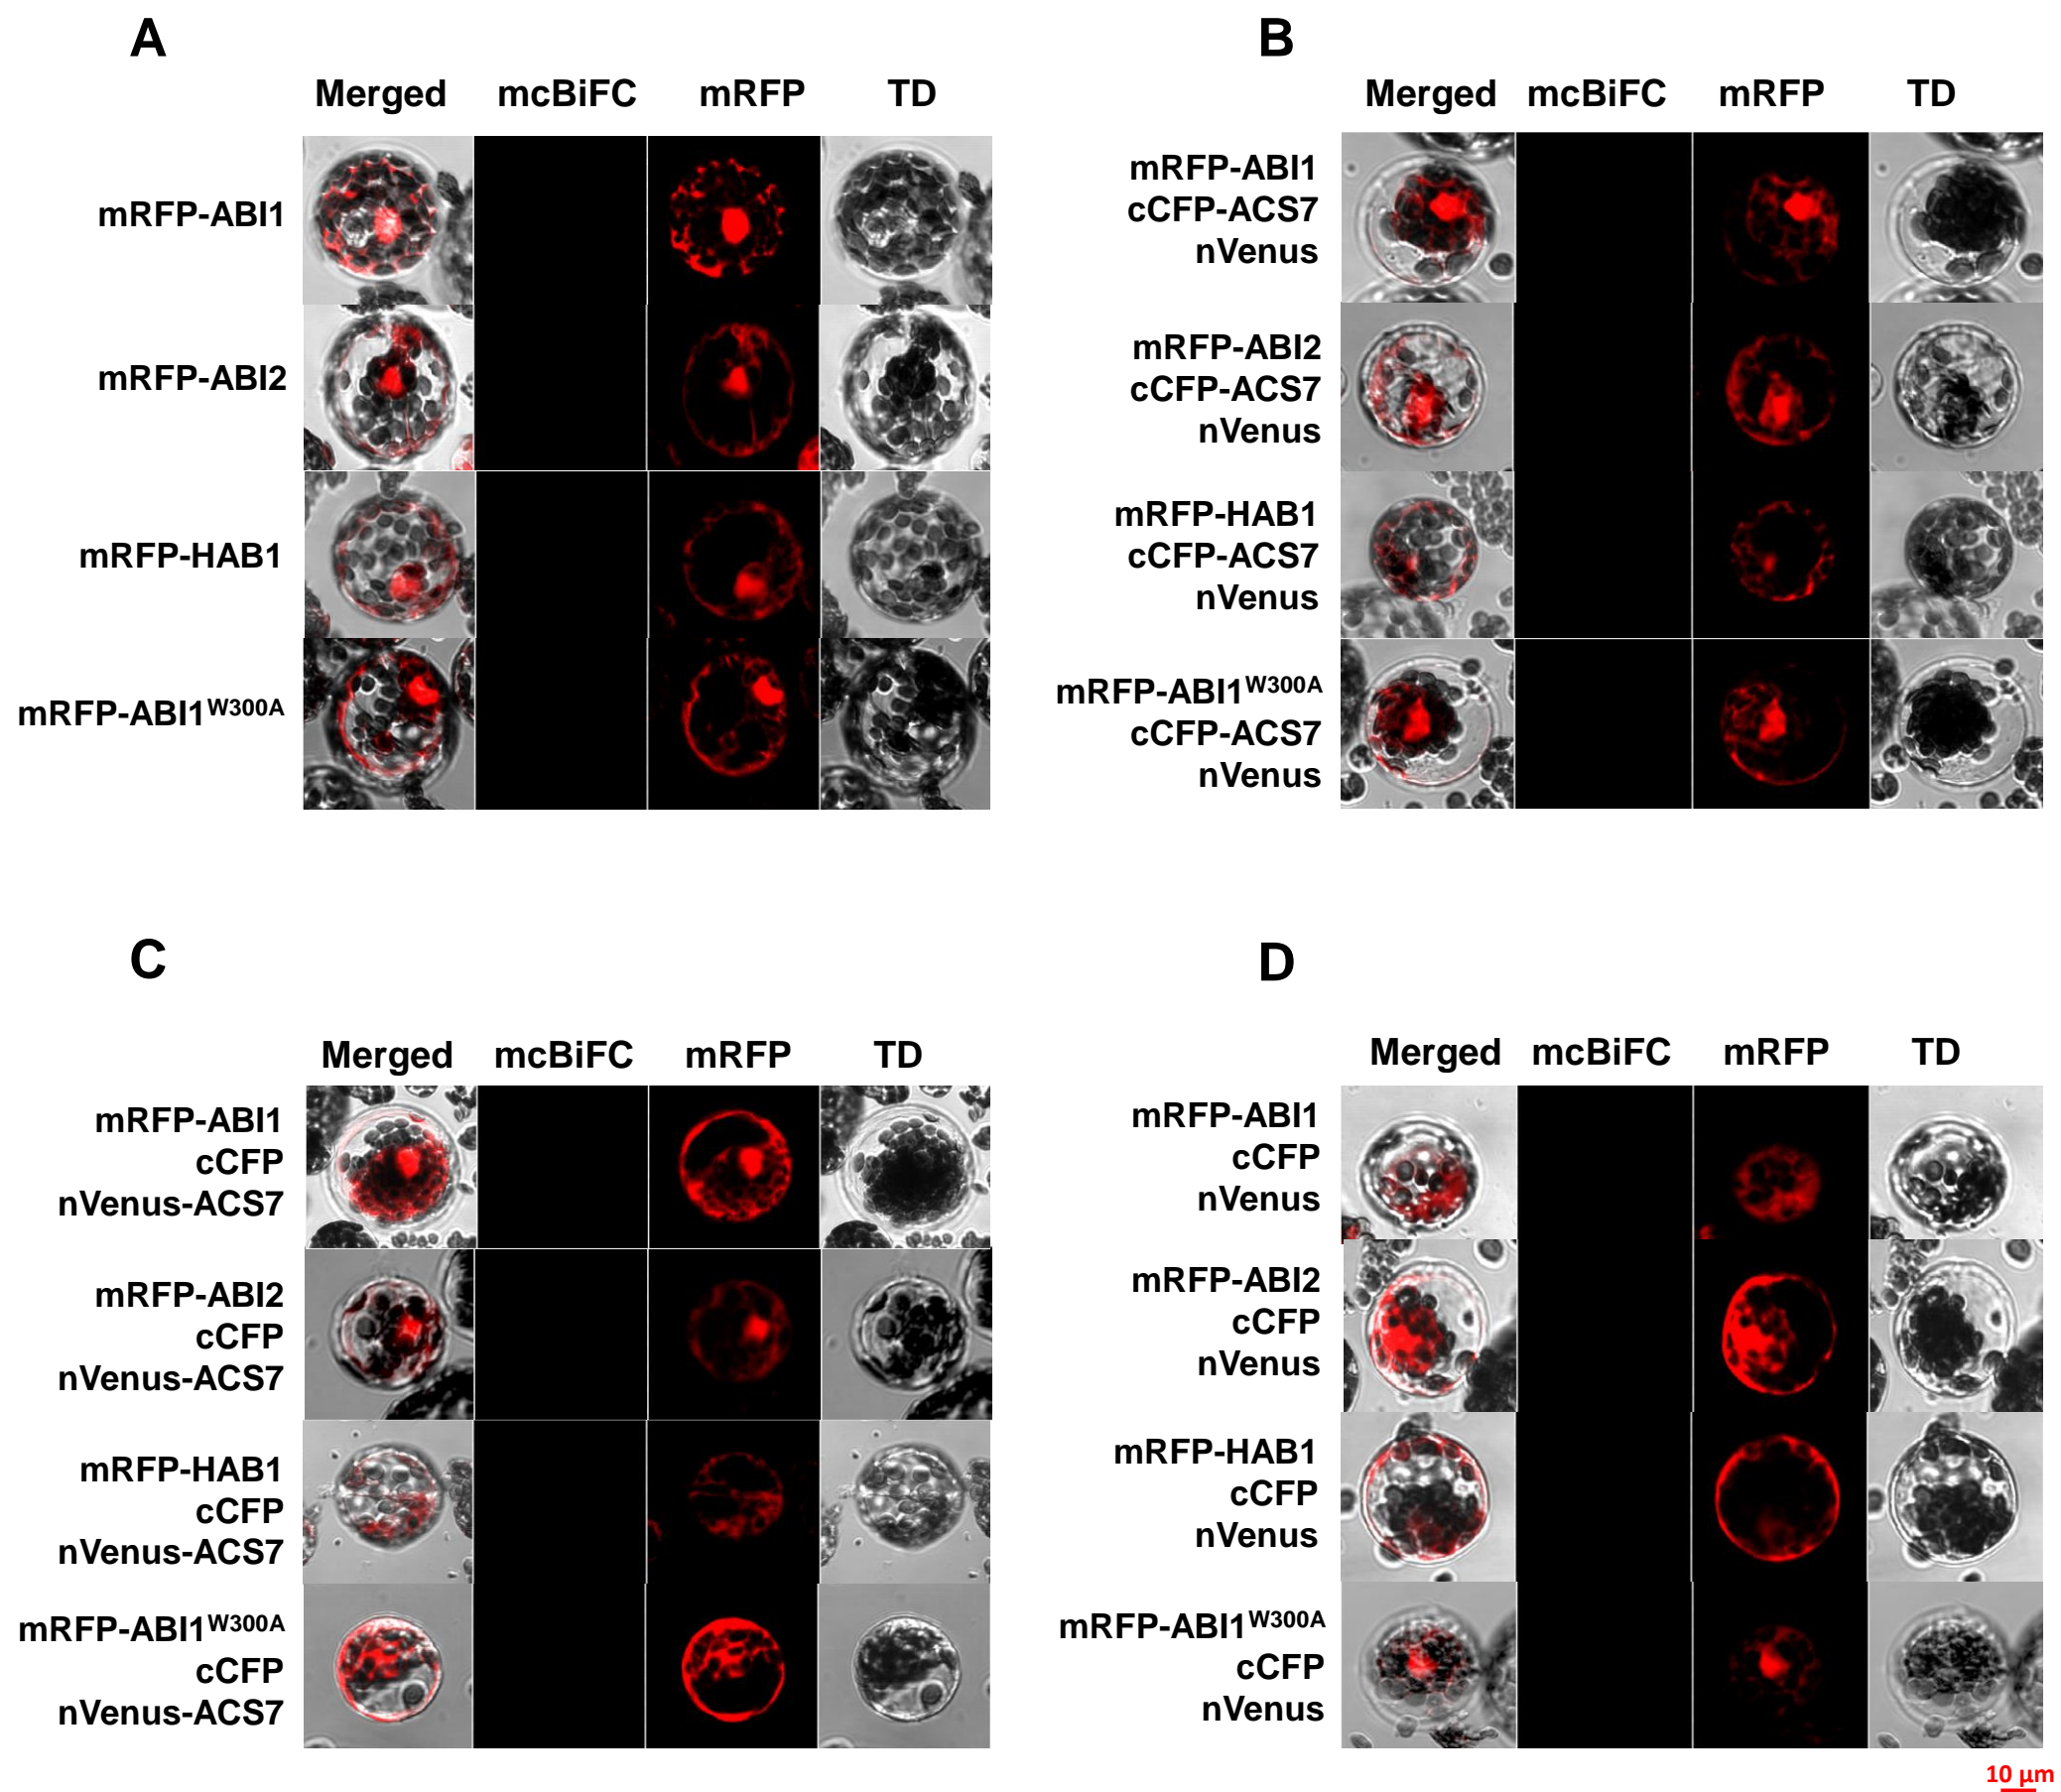

### Supplementary Figure S2. Multicolor BiFC-FRET-FLIM controls.

Control transformations confirming the specificity of interaction between the ACS7 homodimer and PP2Cs. **A.** Protoplasts transformed with ABI1/ABI2/HAB1 and ABI1W300A fused with mRFP (mRFP-PP2C); **B.** Arabidopsis protoplasts transformed with mRFP-PP2C, cCFP-ACS7 and empty vector with nVenus; **C.** Arabidopsis protoplasts transformed with PP2C-mRFP, ACS7-nVenus and empty vector with cCFP **D.** Co-expression of mRFP-PP2C with cCFP and nVenus empty vectors. As expected no signal is observed in the donor (mcBiFC) channels. Scale bar, 10  $\mu$ m.

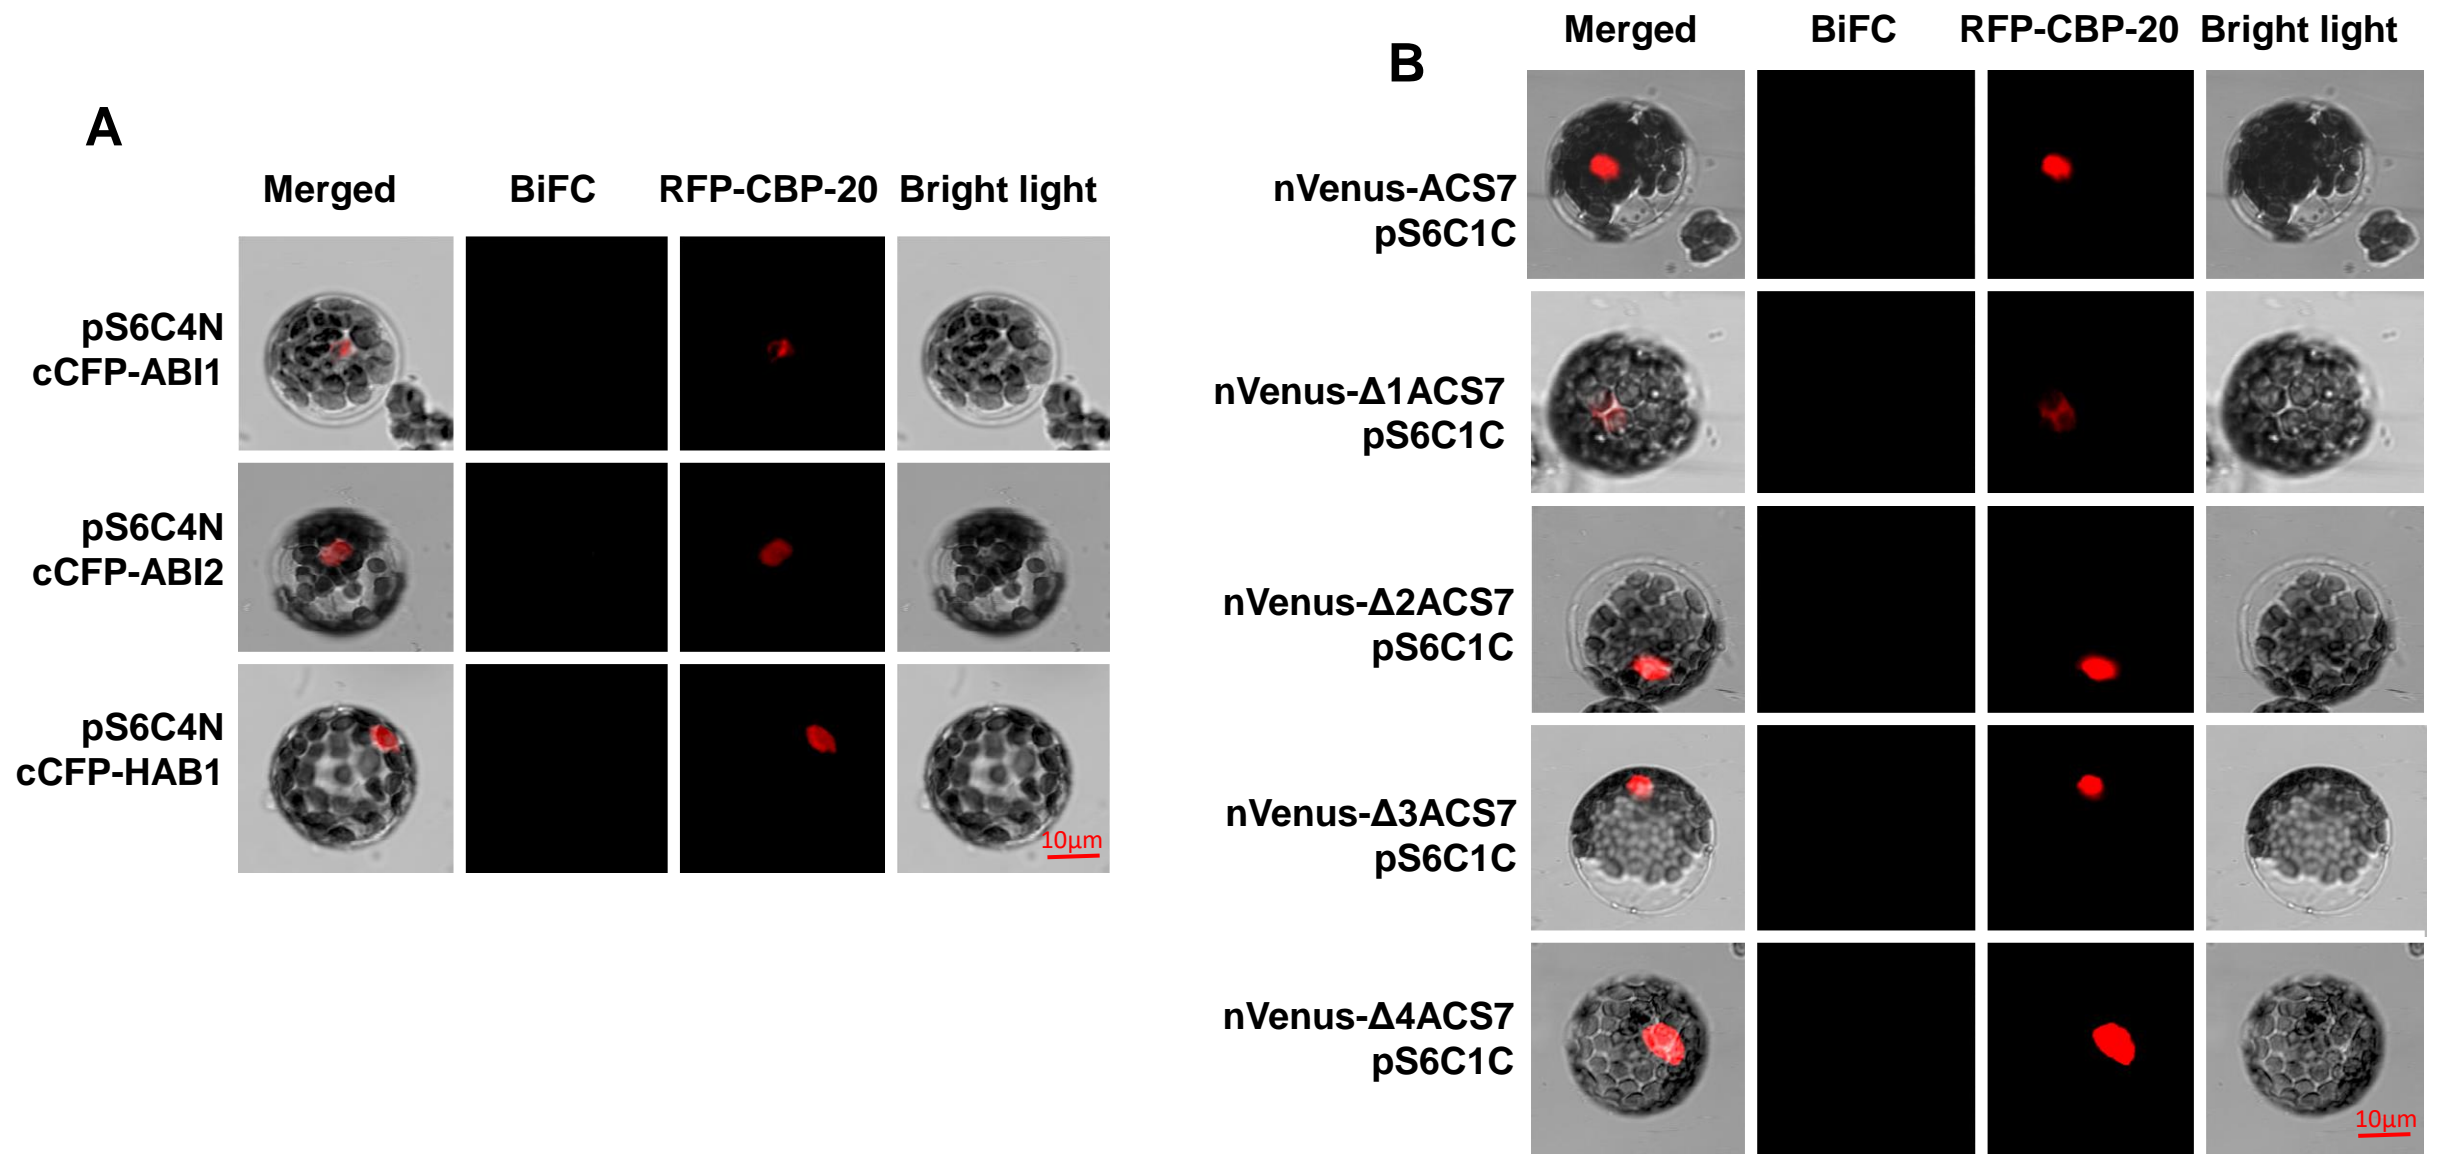

### Supplementary Figure S3. BiFC controls.

Control transformations confirming the specificity of interaction between the ACS7/ $\Delta$ 1/ $\Delta$ 2/ $\Delta$ 3 / $\Delta$ 4ACS7 and PP2Cs (ABI1/ABI2/HAB1). **A.** Protoplasts transformed with ABI1/ABI2/HAB1 fused with cCFP (cCFP-PP2C) and empty vector with nVenus (pS6C4N). **B.** Arabidopsis protoplasts transformed with nVenus- ACS7/ $\Delta$ 1/ $\Delta$ 2/ $\Delta$ 3 / $\Delta$ 4ACS7 and empty vector with cCFP (pS6C1C). The signal is not observed in the GFP channels. Scale bar, 10  $\mu$ m.

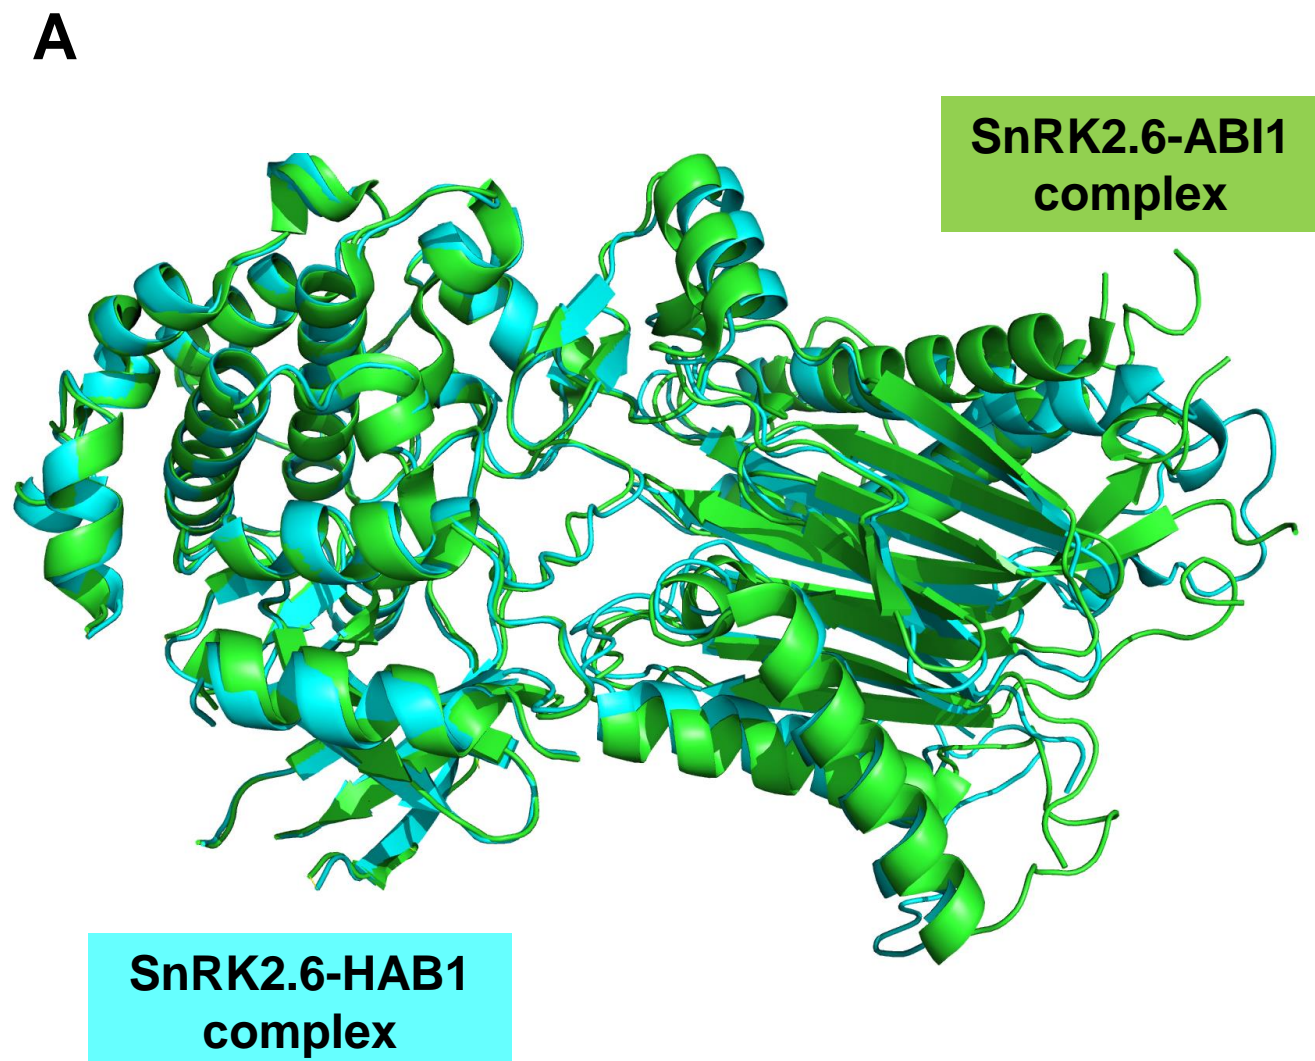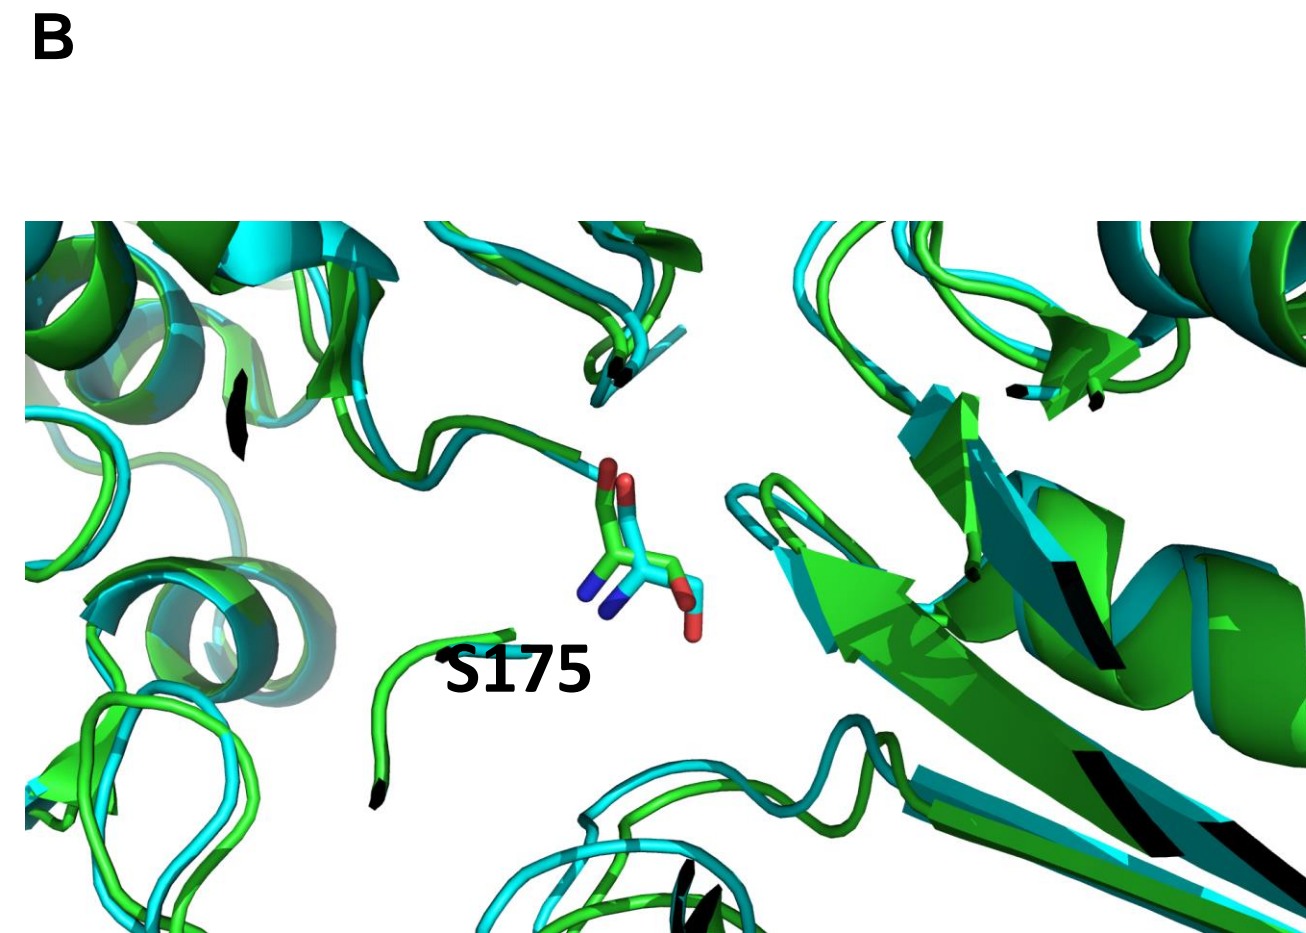

**Supplementary Figure S4. Testing the proposed macromolecular docking model.**

**A.** Superposition of the SnRK2.6-HAB1 complex (PDB code: 3UJG) and the SnRK2.6-ABI1 complex – the structural model represents the best result from *in silico* macromolecular docking experiments using Haddock software; **B.** Close up view of the aligned protein complex with serine residue (S175) labelled and highlighted as sticks. Root-mean-square-deviation (RMSD) value for the position of the serine residue (S175) equals 0.9 Å.

**A**

| Target               | Haddock Score (HS)     | Rank     | RMSD*        |
|----------------------|------------------------|----------|--------------|
| ACS7 <sup>S24</sup>  | -151.8 +/- 1.7         | 3        | 15.825       |
| ACS7 <sup>S48</sup>  | <b>-155.1 +/- 8.9</b>  | <b>2</b> | <b>4.979</b> |
| ACS7 <sup>S52</sup>  | -142.9 +/- 1.4         | 4        | 13.324       |
| ACS7 <sup>S85</sup>  | <b>-160.4 +/- 12.2</b> | <b>1</b> | <b>8.673</b> |
| ACS7 <sup>S182</sup> | -134.9 +/- 7.9         | 6        | 9.170        |
| ACS7 <sup>S183</sup> | -130.5 +/- 25.6        | 7        | 6.877        |
| ACS7 <sup>S272</sup> | -118.8 +/- 4.1         | 8        | 9.090        |
| ACS7 <sup>S413</sup> | -138.2 +/- 1.4         | 5        | 16.107       |

**B**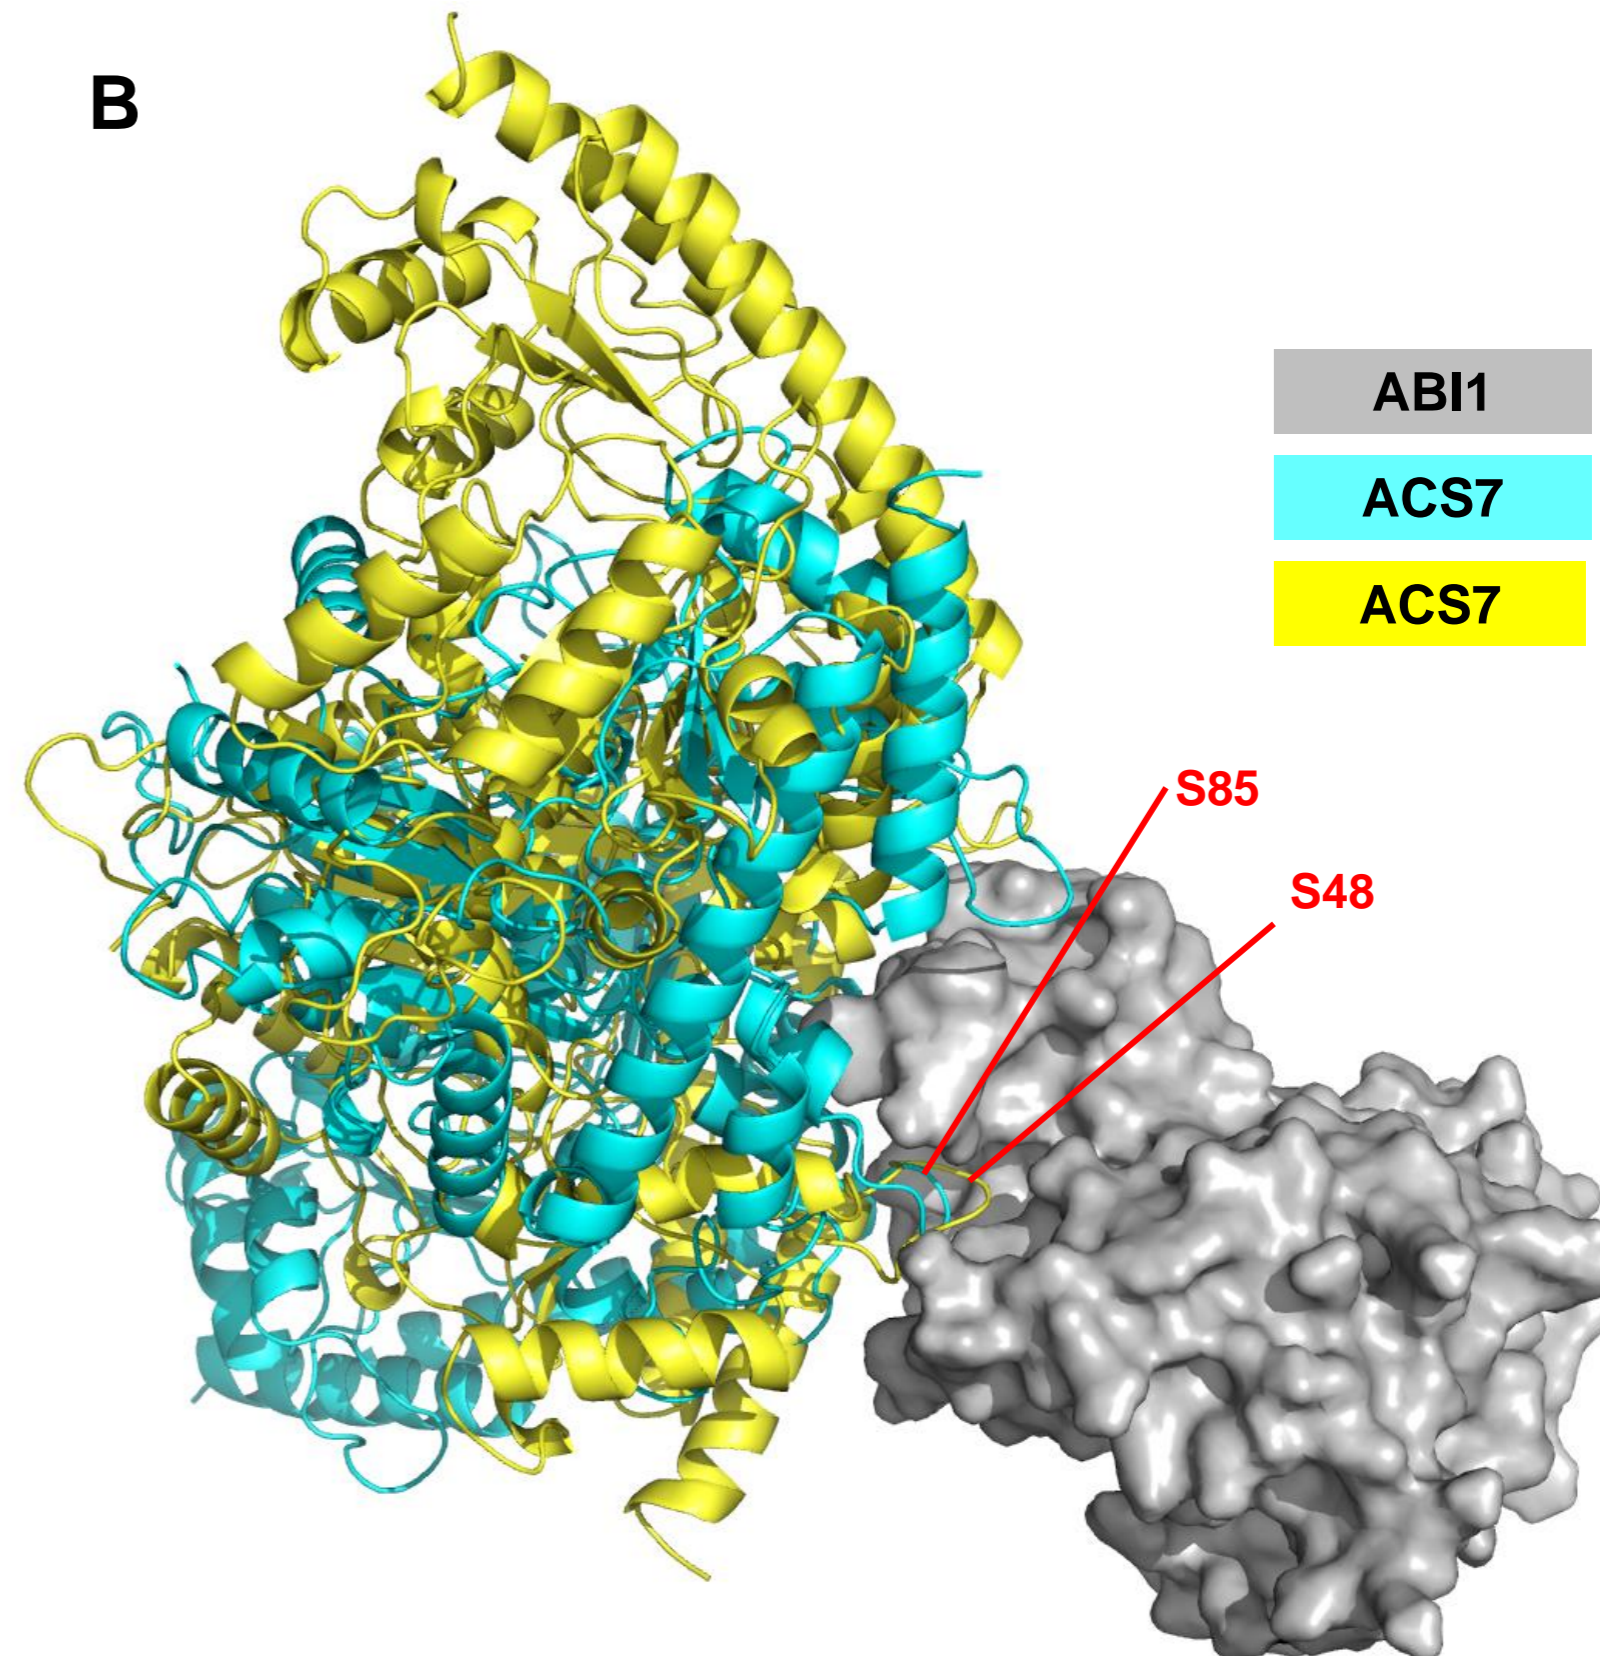

### Supplementary Figure S5. Summary of Haddock predictions.

**A.** Target serine residues in the ACS7 protein were used as constraints to build the complex with ABI1 and docked into the proposed binding site of the ABI1 protein; thermodynamic data of the investigated complexes were calculated using the Haddock scoring function. Rank refers to the ranking of that particular ABI1-ACS7 complex by the Haddock scoring function. **B.** The top-ranked ABI1-ACS7 complexes according to the Haddock scoring function and visual analysis. ACS7 protein is shown in cartoon representation with the target serine residues indicated; ABI1 protein is shown as a grey surface.

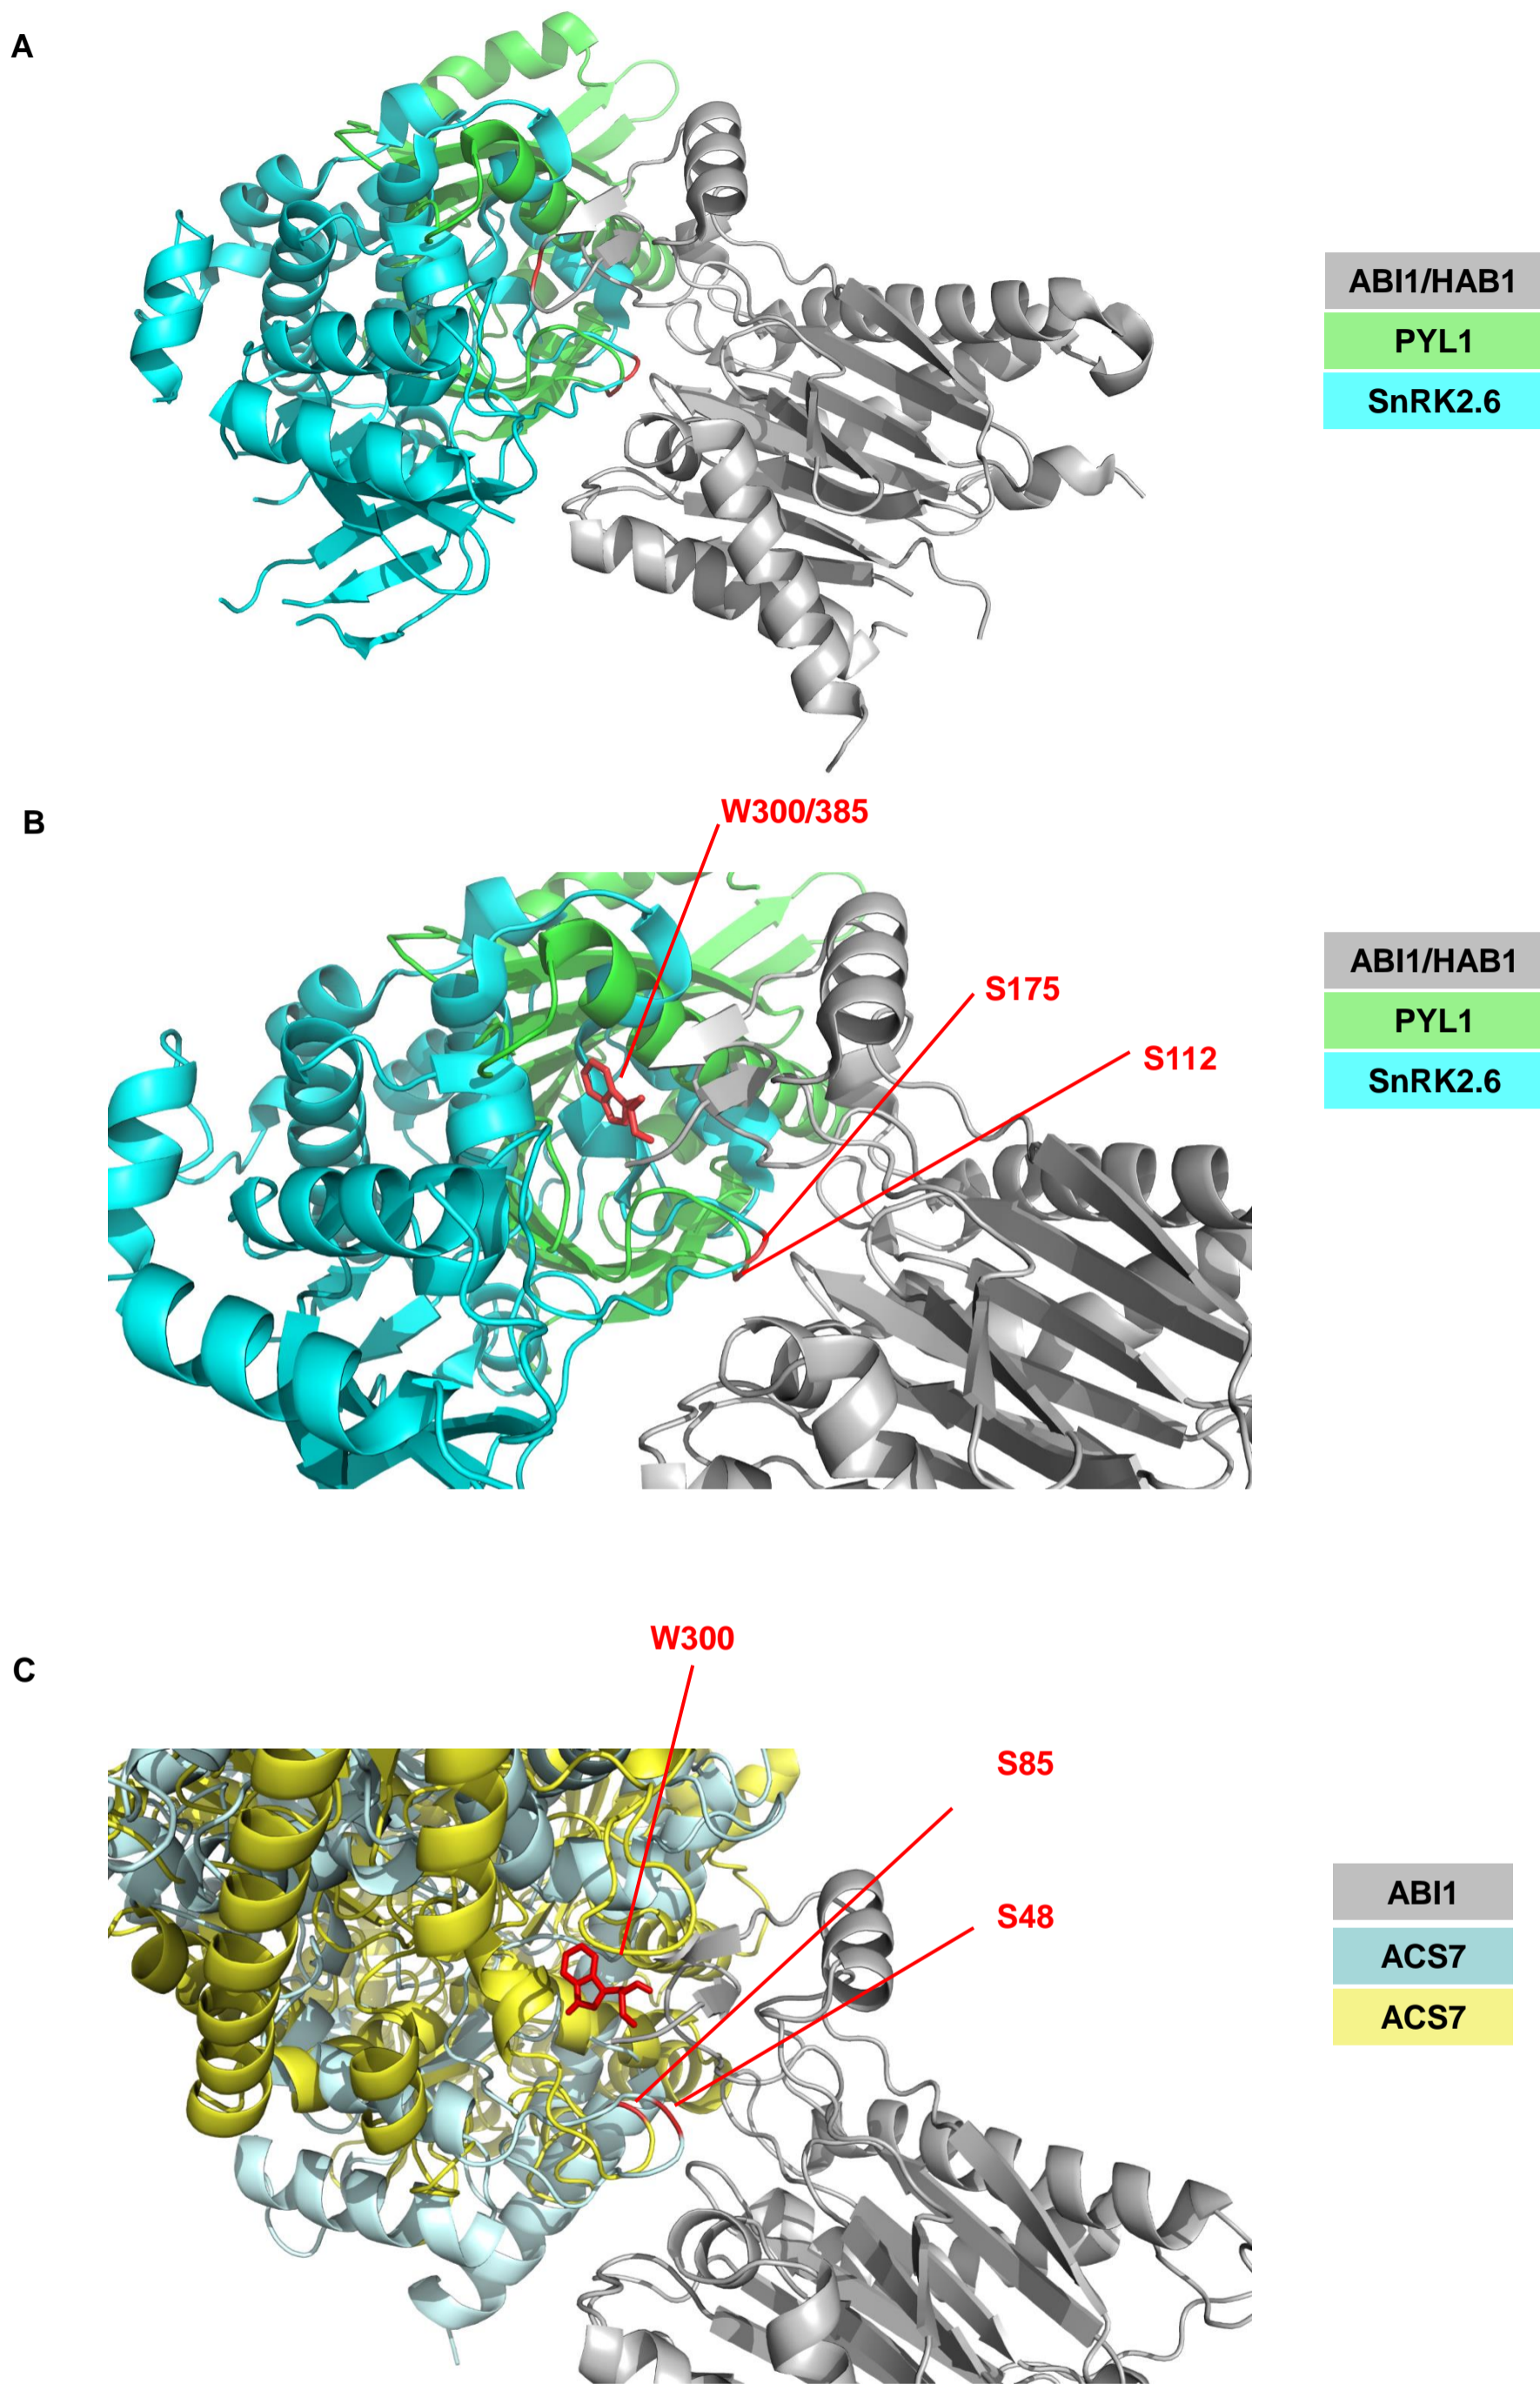

**Supplementary Figure S6. Structural insights into the interaction mechanisms in the PYL1/SnRK2.6-ABI1 and ACS7-ABI1 protein complexes.**

**A.** Ribbon diagram of the aligned SnRK2.6-HAB1/ABI1-PYL1 complex: ABI1 and HAB1 are in grey; SnRK2.6 is shown as a blue cartoon and PYL1 is shown in green; **B.** In the structure, residues that take part in the protein-protein interaction are highlighted (S residues of PYL1 and SnRK2.6 proteins; the W300 residue of ABI1 is highlighted as red sticks); **C.** Superposition of ACS7 structures and ABI1, with residues involved in the interaction highlighted. ACS7 in different orientations is shown as green, yellow and cyan cartoons. ABI1 is shown in grey.

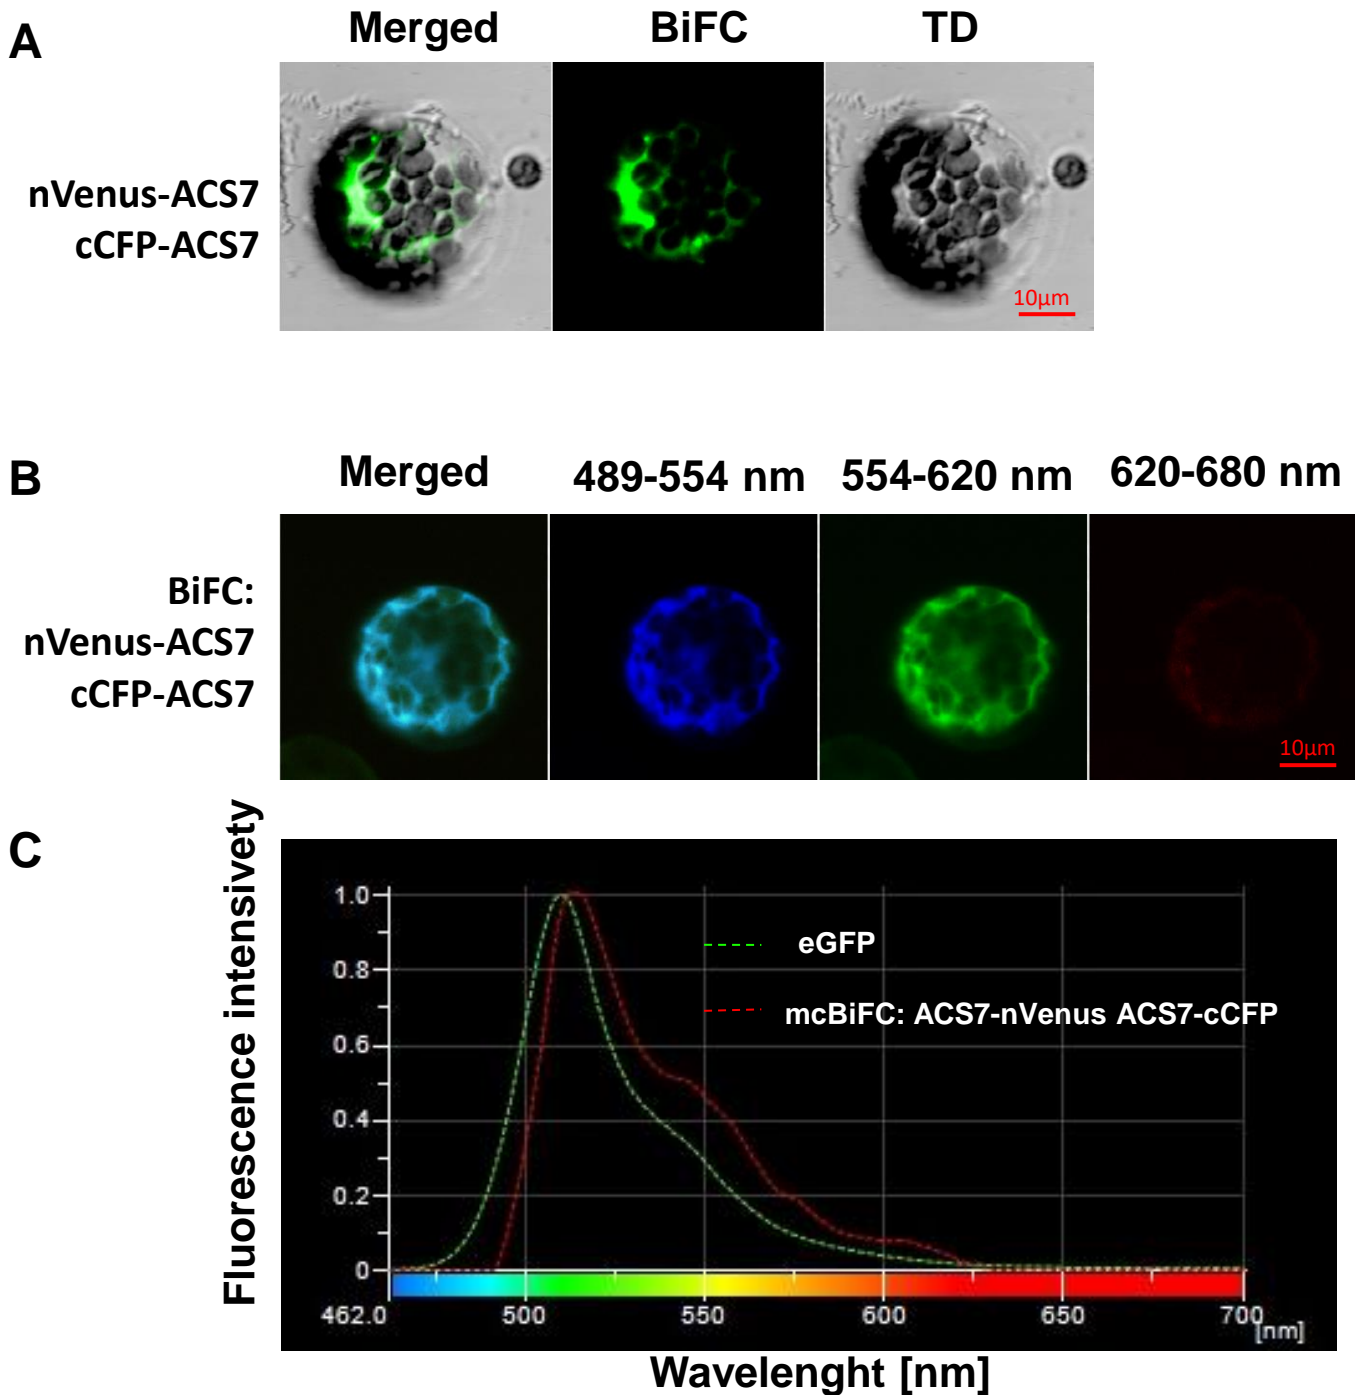

### Supplementary Figure S7. Multicolor BiFC-FRET-FLIM.

**A.** Multicolor BiFC-FRET-FLIM analyses of protein interactions between the ACS7 homodimer and PP2C proteins (ABI1, ABI2, HAB1, ABI1 W300A) in *A. thaliana* protoplasts. Co-expression of nVenus-ACS7 and cCFP-ACS7 in protoplasts leads to reconstruction of a fluorescent nVenus-cCFP protein by mcBiFC due to the formation of the ACS7 homodimer. This reconstructed nVenus-cCFP acts as donor. The acceptor mRFP is fused to ABI1, ABI1 W300A, ABI2 or HAB1. **B.** Fluorescence lifetime of the donor molecule was measured in picoseconds [ps]. Error bars indicate the SD (standard deviation,  $n > 10$ ), and the asterisk indicates a significant difference between the sample in the presence and absence of an acceptor (\*  $p = 0.004$ ,  $p = 0.014$ ,  $p = 0.006$ ,  $p = 0.005$ ; \*\*  $p < 0.00001$ , respectively). Mean value of reconstructed nVenus-cCFP lifetime is  $T_{amp}$ : 2.28 ns.  $\chi^2 \sim 1$  was considered a perfect fit. Scale bar, 10  $\mu\text{m}$ . There is no significant difference in interaction with ACS7 among the investigated PP2Cs.

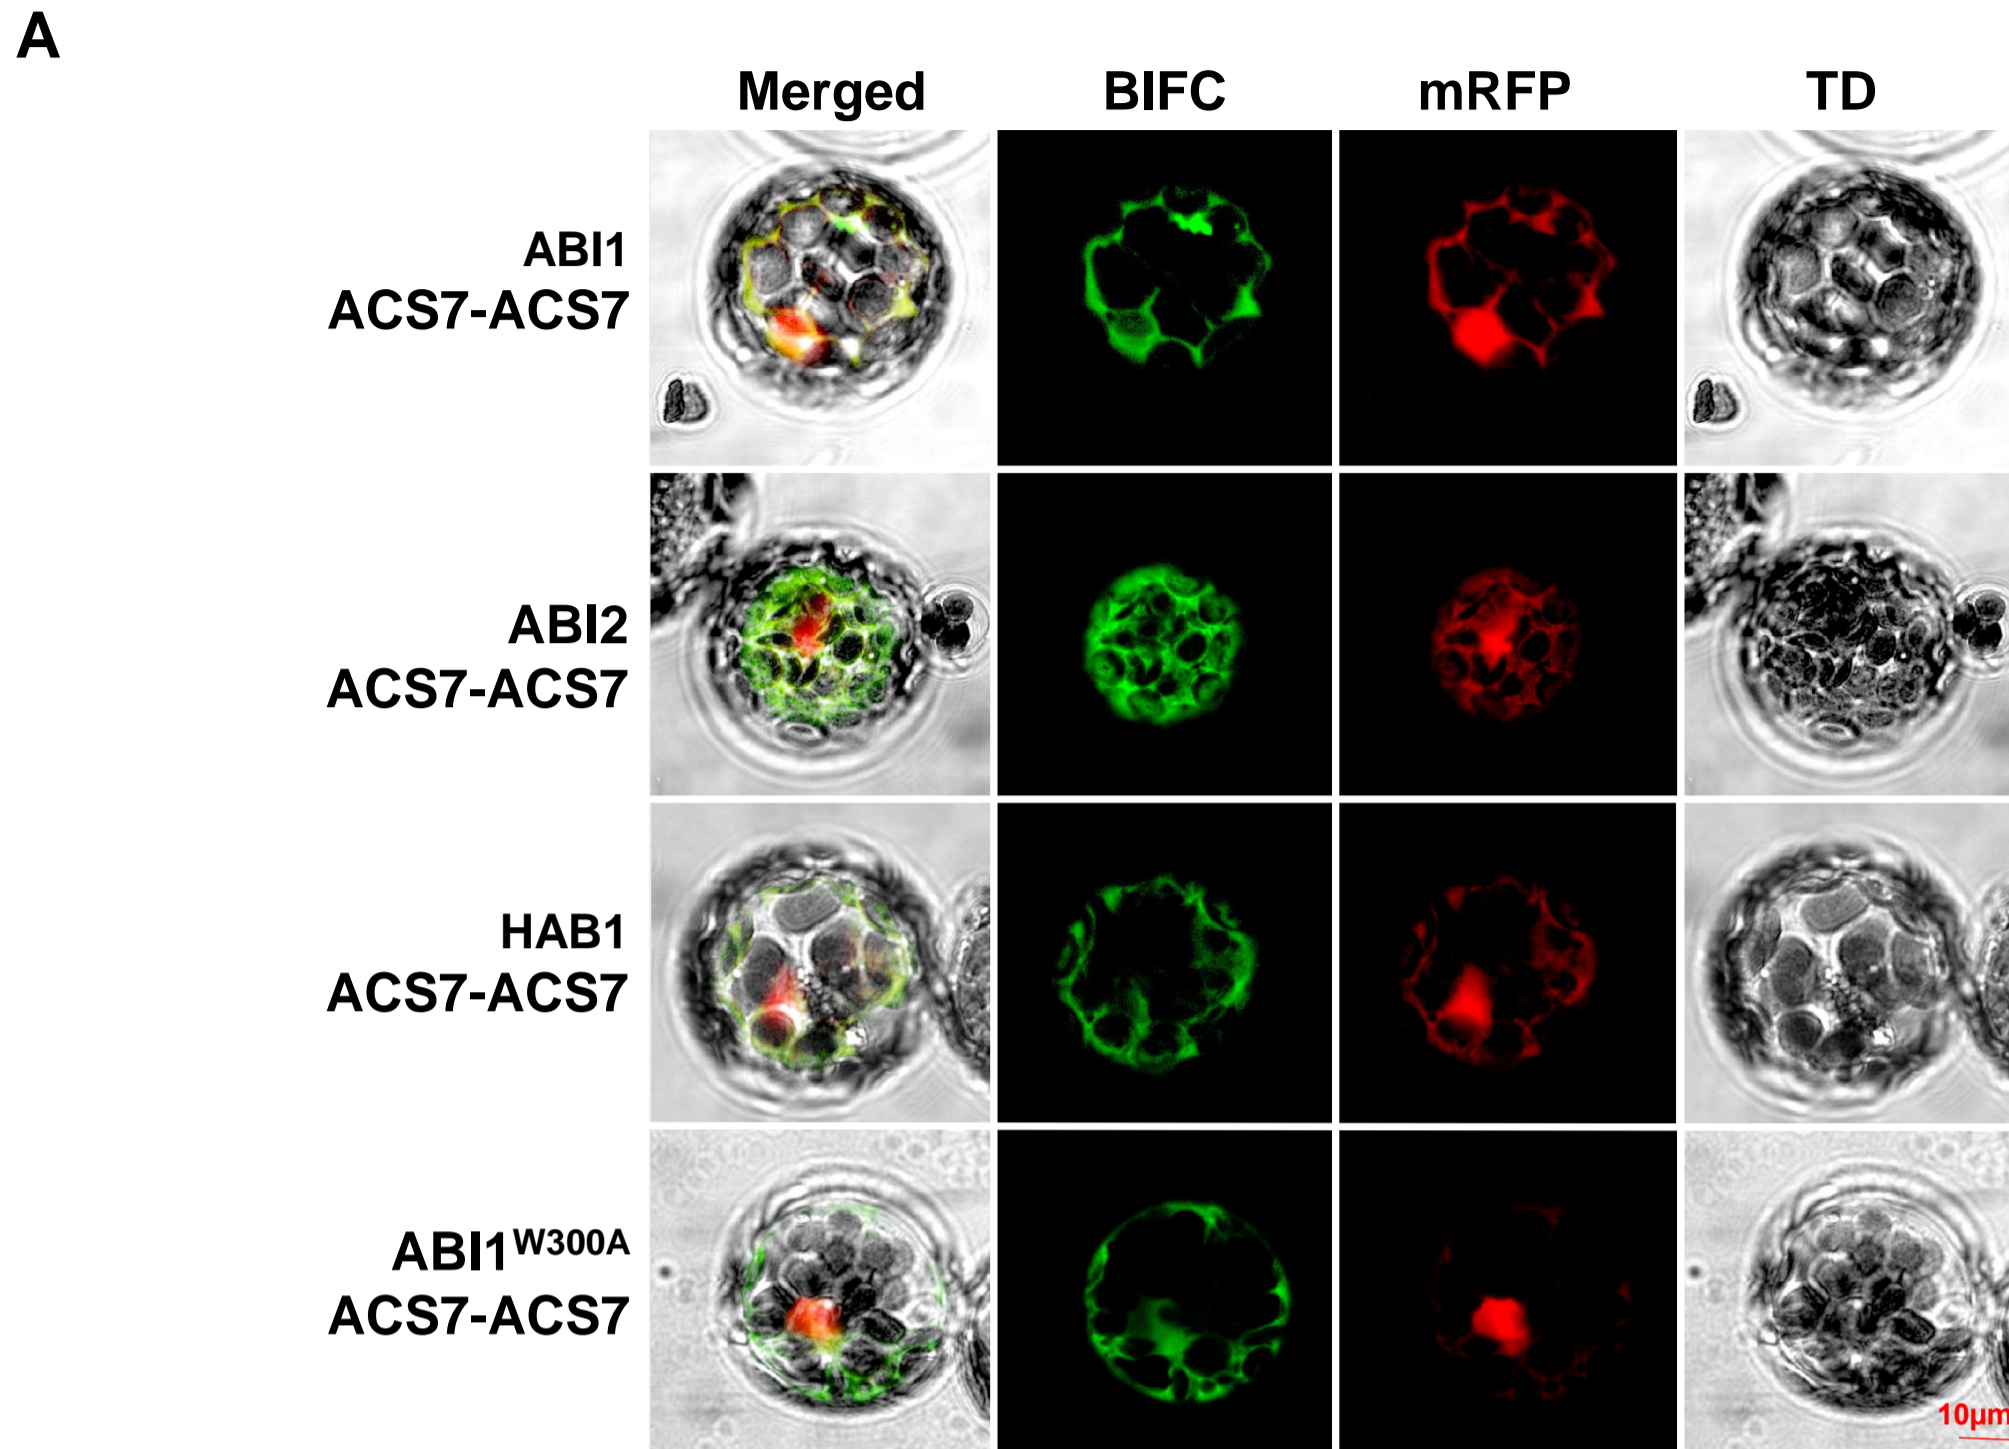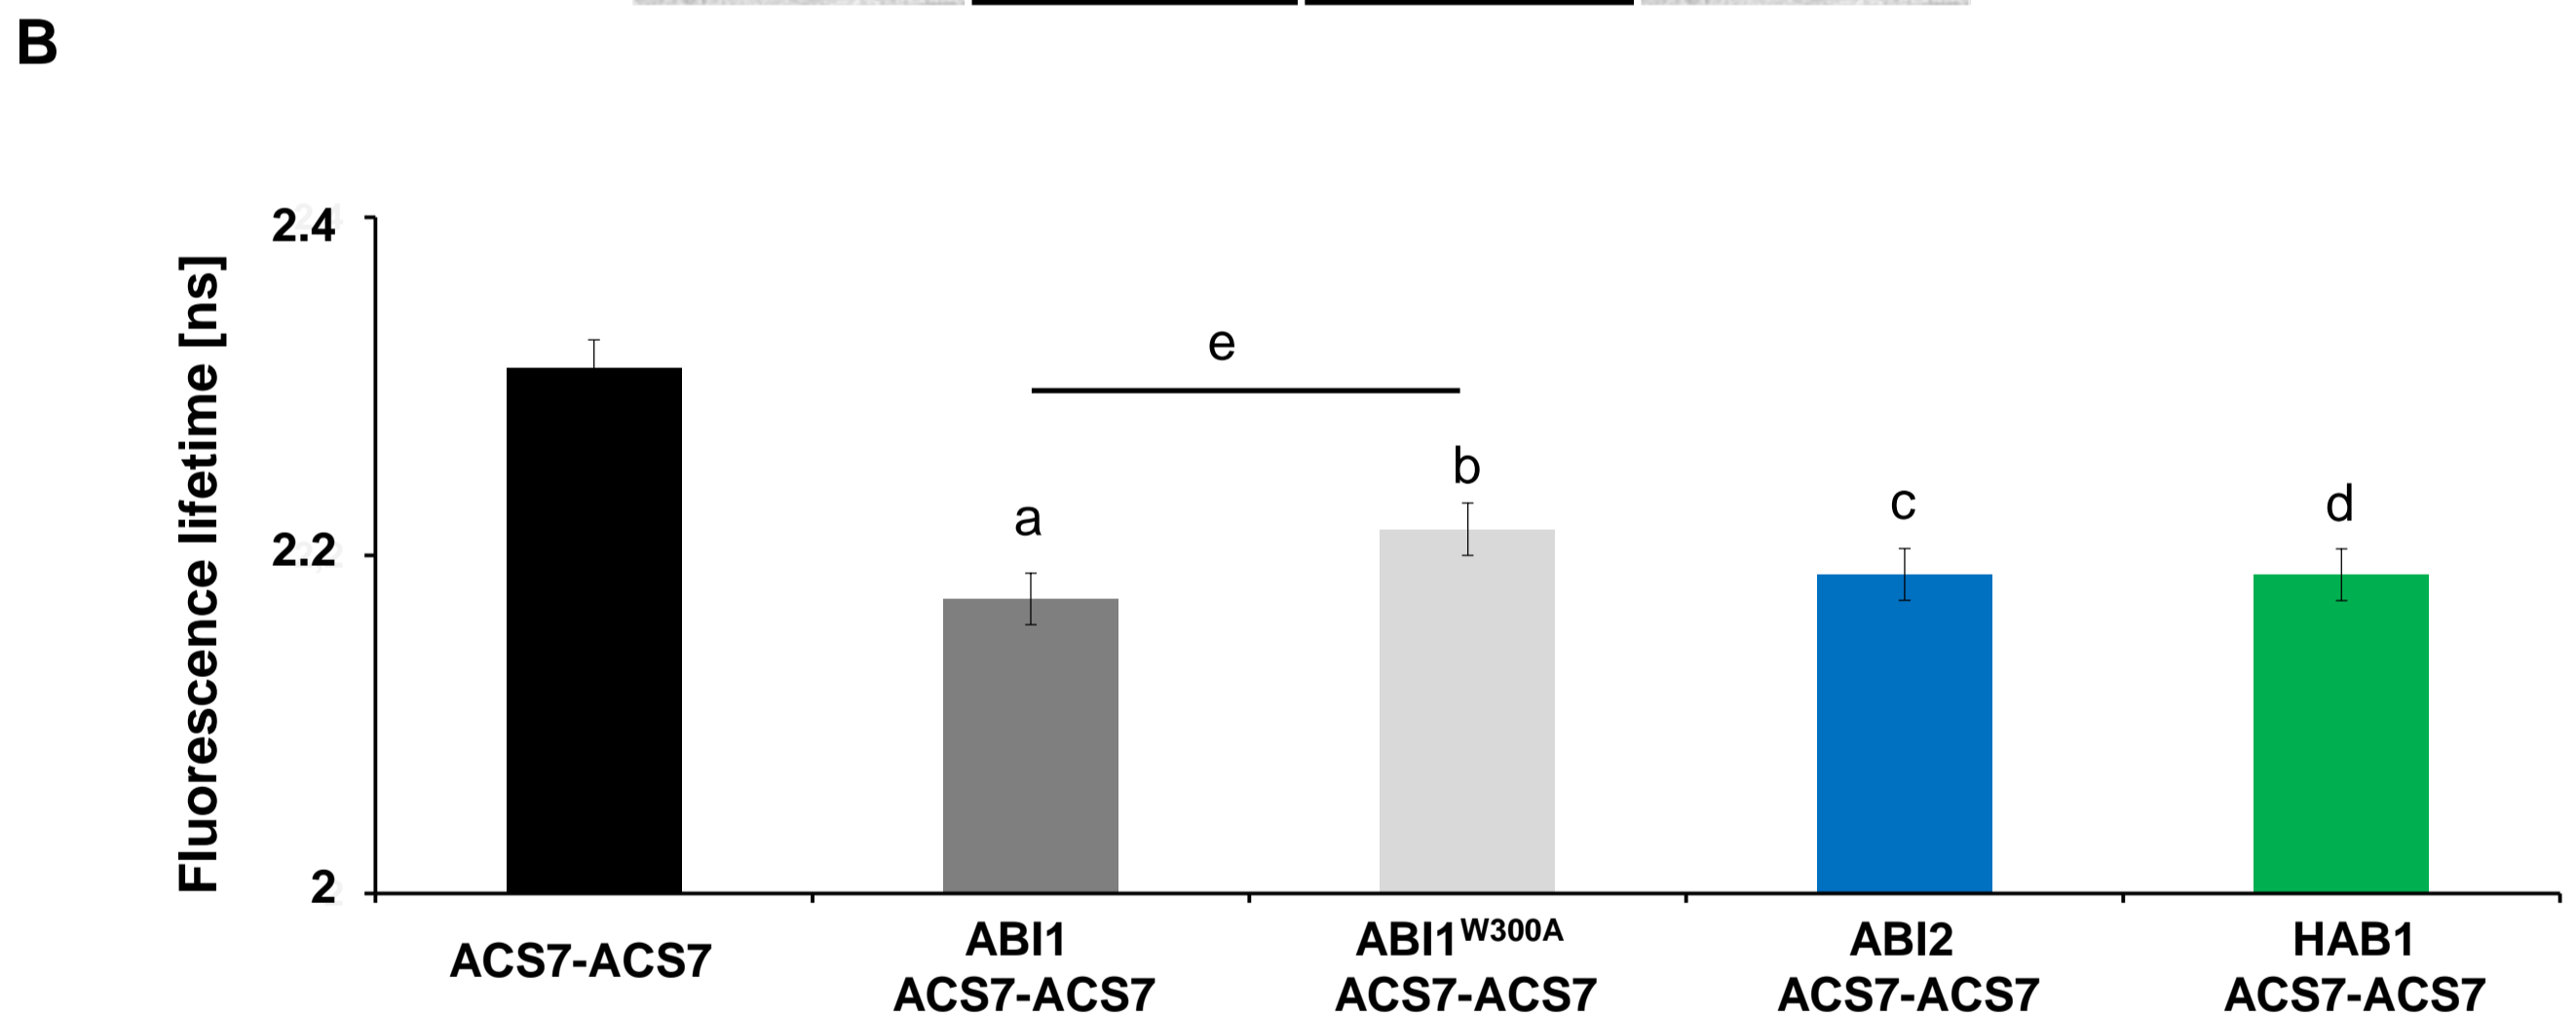

**Supplementary Figure S8. Emission spectrum of nVenus-cCFP BiFC in protoplasts.**

**A.** Visualization of nVenus-ACS7 and cCFP-ACS7 BiFC with 488 nm laser, standard confocal detector and fluorescence emission filter set (500–550 nm); **B.** After nVenus-ACS7 and cCFP-ACS7 complex were transiently expressed in protoplasts, the emission spectrum of the reconstructed fluorophore was measured by Nikon A1R confocal microscope with a 488 nm laser and spectral detector in range 489–680 nm with 6 nm resolution, according to the instruction manual of Nikon Instruments; **C.** Comparison of eGFP fluorescence emission spectrum and nVenus-cCFP emission spectrum visualized in Nikon NIS-Elements software.



### Supplementary Table S1. List of primers used in this study.

List of primer sequences used for vector construction and mutagenesis.

| Name of primers     | Primer sequences 5'->3'            |
|---------------------|------------------------------------|
| ABI1 Reverse        | TCAGTT CAAGGG TTTGCT CTTGAG TTTCC  |
| ABI1 Forward        | ATGGAG GAAGTA TCTCCG GCGATC        |
| ABI2 Reverse        | TCAATT CAAGGA TTTGCT CTTGAA TTTCC  |
| ABI2 Forward        | ATGGAC GAAGTT TCTCCT GCAGTC G      |
| HAB1 Reverse        | CATTCA GGTCTT GGTCTT GAACTT TCTTTG |
| HAB1 Forward        | CACCAT GATGGA GGAGAT GACTC         |
| AHG1Reverse         | TTACTG AGAGCT ATTCTT GAGATC AATGAC |
| AHG1Forward         | CACCAT GACTGA AATCTA CAGAAC AATTC  |
| ABI1 W300A Reverse  | CGAGCT CCATTC GCCTGA ATCACT TTC    |
| ABI1 W300A Forward  | GAAAGT GATTCA GGCGAA TGGAGC TCG    |
| ACS7 S48A Reverse   | GAAGGG TTATGC GCTTCG TCGTAA G      |
| ACS7 S48A Forward   | CTTACG ACGAAG CGCATA ACCCTT C      |
| ACS7 S48D Reverse   | GAAGGG TTATGA TCTTCG TCGTAA G      |
| ACS7 S48DForward    | CTTACG ACGAAG ATCATA ACCCTT C      |
| ACS7 S85A Reverse   | AGCTCC TTTCGC TCCCCA CATC          |
| ACS7 S85A Forward   | GATGTG GGGAGC GAAAGG AGCT          |
| ACS7 S85D Reverse   | GGAGCT CCTTTA TCTCCC CACATC        |
| ACS7 S85D Forward   | GATGTG GGGAGA TAAAGG AGCTCC        |
| ACS7 Reverse C-tag  | AAACCT CCTTCG TCGGTC CA            |
| ACS7 Forward C-tag  | CACCAT GGGTCT TCCTCT AA            |
| ACS7 Reverse N-tag  | TCAAAA CCTCCT TCGTCG GTC           |
| ACS7 Forward N-tag  | CACCGG TCTTCC TCTAAT GAT           |
| Delta1 ACS7 Reverse | TCAGTA GTCTTG AAACAA TCGGTT        |
| Delta2 ACS7 Reverse | TCAGAC ACCGGA AGGGTT AT            |
| Delta4 ACS7 Forward | CACCAT GCACGG TCTCAA AACT          |
| Delta6 ACS7 Forward | CACCCG TGACGC GAACAT TAGAGT        |

**Supplementary Table S2. Evaluation of ACS7-ACS7 (homodimer) structures from macromolecular docking with calculated potential energy in OPLS3 force field.**

Summary table of evaluated conformers of ACS7-ACS7 homodimers from macromolecular docking simulation with potential energy after geometry optimization.

| <b>ACS7 dimer name</b> | <b><math>E_{pot}</math> (kcal*mol<sup>-1</sup>)</b> | <b>Forcefield</b> |
|------------------------|-----------------------------------------------------|-------------------|
| ACS7_dimer_1           | -38681,9                                            | OPLS3             |
| ACS7_dimer_2           | -38884,2                                            | OPLS3             |
| ACS7_dimer_3           | -38937                                              | OPLS3             |
| ACS7_dimer_4           | -39183,2                                            | OPLS3             |
| ACS7_dimer_5           | -39123,6                                            | OPLS3             |
| ACS7_dimer_6           | -38993,2                                            | OPLS3             |
| ACS7_dimer_7           | -38978                                              | OPLS3             |
| ACS7_dimer_8           | -37100,4                                            | OPLS3             |
| ACS7_dimer_9           | -39086,9                                            | OPLS3             |
| ACS7_dimer_10          | -38901,4                                            | OPLS3             |
| ACS7_dimer_11          | -39031,3                                            | OPLS3             |
| ACS7_dimer_12          | -38997                                              | OPLS3             |
| ACS7_dimer_13          | -38943,8                                            | OPLS3             |
| ACS7_dimer_14          | -38980,3                                            | OPLS3             |
| ACS7_dimer_15          | -38960,3                                            | OPLS3             |
| ACS7_dimer_16          | -39046,4                                            | OPLS3             |
| ACS7_dimer_17          | -38888,2                                            | OPLS3             |
| ACS7_dimer_18          | -38987,9                                            | OPLS3             |
| ACS7_dimer_19          | -38797,7                                            | OPLS3             |
| ACS7_dimer_20          | -38879,9                                            | OPLS3             |
| ACS7_dimer_21          | -38994,3                                            | OPLS3             |
| ACS7_dimer_22          | -38831,5                                            | OPLS3             |
| ACS7_dimer_23          | -38949,1                                            | OPLS3             |
| ACS7_dimer_24          | -38893,9                                            | OPLS3             |
| ACS7_dimer_25          | -39052,4                                            | OPLS3             |
| ACS7_dimer_26          | -38885,3                                            | OPLS3             |
| ACS7_dimer_27          | -38918,2                                            | OPLS3             |
| ACS7_dimer_28          | -39002,3                                            | OPLS3             |
| ACS7_dimer_29          | -38820,1                                            | OPLS3             |

**Supplementary Table S3. Evaluation of ACS7-ABI1 docking structures from macromolecular docking with calculated root-mean-square deviation (RMSD).**

Summary table of evaluated ACS7-ABI1 model structure complexes depending on the selected serine residue as target with Haddock score and RMSD value. (\*) RMSD calculated between Ca atoms of the targeted serine of the ACS7-ABI1 complex and serine 175 of the kinase substrate (SnRK2.6)-ABI1 complex. Both complex structures were aligned.

| <b>ACS<sup>S24</sup>- ABI1</b>   | <b>Haddock score</b> | <b>RMSD*</b> | <b><i>E<sub>vdw</sub></i></b> | <b><i>E<sub>elec</sub></i></b> | <b><i>E<sub>desol</sub></i></b> |
|----------------------------------|----------------------|--------------|-------------------------------|--------------------------------|---------------------------------|
| Cluster1                         | -151.8 +/- 1.7       | 15.825       | -57.9 +/- 3.1                 | -236.7 +/- 7.3                 | -53.8 +/- 6.2                   |
| cluster7                         | -133.2 +/- 13.8      | 22.097       | -45.2 +/- 5.2                 | -277.6 +/- 24.8                | -36.0 +/- 13.9                  |
| cluster6                         | -118.5 +/- 12.9      | 15.978       | -38.6 +/- 6.2                 | -107.7 +/- 17.8                | -68.1 +/- 10.7                  |
| cluster8                         | -114.9 +/- 8.9       | 16.446       | -48.2 +/- 6.1                 | -190.1 +/- 38.4                | -34.8 +/- 3.0                   |
| cluster2                         | -114.7 +/- 5.4       | 19.917       | -37.8 +/- 2.1                 | -139.4 +/- 30.2                | -55.7 +/- 6.0                   |
| cluster4                         | -111.6 +/- 11.5      | 18.017       | -52.0 +/- 3.8                 | -133.4 +/- 32.4                | -42.2 +/- 8.4                   |
| cluster5                         | -108.6 +/- 12.3      | 19.529       | -56.4 +/- 6.3                 | -135.7 +/- 43.9                | -27.0 +/- 8.6                   |
| cluster3                         | -105.4 +/- 5.1       | 22.327       | 36.9 +/- 6.0                  | -161.9 +/- 25.0                | -38.7 +/- 6.0                   |
| cluster9                         | -101.6 +/- 14.6      | 15.003       | -34.6 +/- 1.8                 | -162.2 +/- 42.9                | -39.9 +/- 8.8                   |
| <b>ACS<sup>S48</sup>- ABI1</b>   | <b>Haddock score</b> | <b>RMSD*</b> | <b><i>E<sub>vdw</sub></i></b> | <b><i>E<sub>elec</sub></i></b> | <b><i>E<sub>desol</sub></i></b> |
| cluster1                         | -155.1 +/- 8.9       | 4.979        | -49.5 +/- 12.6                | -408.5 +/- 73.                 | -24.1 +/- 13.1                  |
| cluster2                         | -135.9 +/- 2.8       | 4.355        | -54.2 +/- 9.3                 | -152.0 +/- 19.6                | -51.5 +/- 4.2                   |
| cluster5                         | -134.9 +/- 4.0       | 7.346        | -30.4 +/- 7.1                 | -344.8 +/- 28.2                | -36.7 +/- 3.5                   |
| cluster3                         | -124.2 +/- 1.7       | 9.116        | -52.8 +/- 5.2                 | -176.8 +/- 48.7                | -36.2 +/- 10.4                  |
| cluster7                         | -110.0 +/- 9.3       | 6.274        | -45.3 +/- 4.6                 | -123.8 +/- 35.3                | -40.0 +/- 7.5                   |
| cluster8                         | -109.8 +/- 21.0      | 10.547       | -36.5 +/- 5.2                 | -147.8 +/- 45.7                | -43.9 +/- 13.7                  |
| cluster6                         | -100.8 +/- 2.4       | 16.513       | -45.2 +/- 3.9                 | -58.0 +/- 13.3                 | -49.0 +/- 3.7                   |
| cluster4                         | -95.8 +/- 1.2        | 5.792        | -31.6 +/- 3.6                 | -228.9 +/- 28.1                | -18.6 +/- 7.9                   |
| <b>ACS<sup>S52</sup>- ABI1</b>   | <b>Haddock score</b> | <b>RMSD*</b> | <b><i>E<sub>vdw</sub></i></b> | <b><i>E<sub>elec</sub></i></b> | <b><i>E<sub>desol</sub></i></b> |
| cluster1                         | -142.9 +/- 1.4       | 13.324       | -40.3 +/- 6.4                 | -333.4 +/- 15.1                | -35.9 +/- 7.8                   |
| cluster2                         | -127.4 +/- 4.7       | 10.827       | -44.0 +/- 12.2                | -197.3 +/- 17.5                | -43.9 +/- 6.1                   |
| cluster4                         | -126.4 +/- 3.7       | 13.260       | -54.4 +/- 3.5                 | -130.9 +/- 36.0                | -46.1 +/- 4.1                   |
| cluster9                         | -125.5 +/- 17.8      | 12.703       | -40.8 +/- 12.9                | -210.0 +/- 91.7                | -43.8 +/- 1.7                   |
| cluster3                         | -118.8 +/- 7.0       | 13.666       | -39.8 +/- 7.7                 | -46.0 +/- 40.9                 | -74.7 +/- 11.6                  |
| cluster10                        | -112.7 +/- 11.1      | 15.638       | -39.7 +/- 6.0                 | -182.4 +/- 31.3                | -36.6 +/- 6.1                   |
| cluster6                         | -108.9 +/- 4.4       | 16.156       | -36.4 +/- 9.8                 | -140.3 +/- 36.2                | -44.5 +/- 14.2                  |
| cluster5                         | -108.7 +/- 7.4       | 15.165       | -37.5 +/- 5.0                 | -169.7 +/- 30.9                | -37.3 +/- 5.5                   |
| cluster8                         | -106.3 +/- 9.9       | 14.863       | -29.3 +/- 5.2                 | -308.1 +/- 32.8                | -16.3 +/- 1.9                   |
| cluster7                         | -102.6 +/- 8.9       | 14.135       | -29.8 +/- 3.2                 | -253.3 +/- 61.7                | -22.3 +/- 16.6                  |
| <b>ACS7<sup>S85</sup>- ABI1</b>  | <b>Haddock score</b> | <b>RMSD*</b> | <b><i>E<sub>vdw</sub></i></b> | <b><i>E<sub>elec</sub></i></b> | <b><i>E<sub>desol</sub></i></b> |
| cluster1                         | -160.4 +/- 12.2      | 8.673        | -48.4 +/- 6.2                 | -330.0 +/- 63.5                | -46.1 +/- 5.9                   |
| cluster2                         | -151.7 +/- 14.5      | 7.176        | -41.0 +/- 11.8                | -388.3 +/- 18.1                | -33.2 +/- 17.3                  |
| cluster4                         | -135.2 +/- 22.7      | 9.416        | -40.6 +/- 9.0                 | -299.7 +/- 45.8                | -34.7 +/- 7.5                   |
| cluster5                         | -111.9 +/- 22.0      | 8.417        | -25.6 +/- 4.1                 | -325.9 +/- 103.2               | -21.2 +/- 13.3                  |
| cluster3                         | -99.2 +/- 23.1       | 9.398        | -28.7 +/- 16.1                | -295.4 +/- 31.4                | -11.9 +/- 8.2                   |
| <b>ACS7<sup>S182</sup>- ABI1</b> | <b>Haddock score</b> | <b>RMSD*</b> | <b><i>E<sub>vdw</sub></i></b> | <b><i>E<sub>elec</sub></i></b> | <b><i>E<sub>desol</sub></i></b> |
| cluster3                         | -134.9 +/- 7.9       | 9.170        | -55.6 +/- 5.3                 | -270.4 +/- 35.6                | -29.2 +/- 8.1                   |
| cluster1                         | -119.2 +/- 0.8       | 11.425       | -54.1 +/- 7.2                 | -149.9 +/- 24.4                | -40.4 +/- 8.9                   |
| cluster5                         | -107.0 +/- 9.8       | 10.018       | -34.0 +/- 5.0                 | -270.4 +/- 58.9                | -23.4 +/- 13.7                  |
| cluster2                         | -84.8 +/- 14.9       | 12.260       | -18.8 +/- 3.7                 | -182.3 +/- 33.3                | -34.3 +/- 14.5                  |
| cluster4                         | -76.3 +/- 5.8        | 16.618       | -37.3 +/- 4.7                 | -100.2 +/- 25.4                | -22.3 +/- 9.3                   |
| <b>ACS7<sup>S183</sup>- ABI1</b> | <b>Haddock score</b> | <b>RMSD*</b> | <b><i>E<sub>vdw</sub></i></b> | <b><i>E<sub>elec</sub></i></b> | <b><i>E<sub>desol</sub></i></b> |
| cluster4                         | -130.5 +/- 25.6      | 6.877        | -56.3 +/- 11.2                | -255.2 +/- 45.0                | -27.1 +/- 11.3                  |
| cluster1                         | -130.3 +/- 8.8       | 10.618       | -55.5 +/- 4.7                 | -153.2 +/- 21.6                | -46.4 +/- 7.0                   |
| cluster3                         | -92.4 +/- 21.5       | 7.591        | -24.3 +/- 7.0                 | -248.5 +/- 29.1                | -24.1 +/- 18.8                  |
| cluster2                         | -80.7 +/- 5.2        | 11.558       | -20.3 +/- 5.3                 | -127.3 +/- 24.6                | -36.1 +/- 6.1                   |

| ACS7 <sup>S272</sup> - |                 |        | $E_{vdw}$      | $E_{elec}$      | $E_{desol}$    |
|------------------------|-----------------|--------|----------------|-----------------|----------------|
| ABI1                   | Haddock score   | RMSD*  |                |                 |                |
| cluster1               | -118.8 +/- 4.1  | 9.090  | -45.8 +/- 3.9  | -135.9 +/- 23.9 | -51.5 +/- 2.3  |
| cluster3               | -108.4 +/- 0.8  | 9.637  | -37.6 +/- 4.4  | -149.5 +/- 11.6 | -45.8 +/- 1.7  |
| cluster2               | -108.1 +/- 7.8  | 10.904 | -32.0 +/- 3.0  | -190.2 +/- 26.1 | -43.7 +/- 2.3  |
| cluster4               | -101.7 +/- 7.3  | 9.600  | -22.8 +/- 4.8  | -228.8 +/- 54.8 | -39.4 +/- 7.5  |
| cluster7               | -88.4 +/- 9.2   | 8.390  | -20.1 +/- 4.0  | -206.4 +/- 33.7 | -32.8 +/- 2.9  |
| cluster6               | -77.2 +/- 7.9   | 9.637  | -27.5 +/- 3.2  | -104.0 +/- 41.2 | -33.2 +/- 5.6  |
| cluster5               | -76.5 +/- 6.1   | 15.175 | -15.8 +/- 1.4  | -118.9 +/- 38.7 | -36.9 +/- 3.5  |
| ACS7 <sup>S413</sup> - |                 |        | $E_{vdw}$      | $E_{elec}$      | $E_{desol}$    |
| ABI1                   | Haddock score   | RMSD*  |                |                 |                |
| cluster2               | -138.2 +/- 1.4  | 16.107 | -47.7 +/- 8.3  | -333.9 +/- 16.1 | -28.0 +/- 7.8  |
| cluster1               | -118.1 +/- 1.6  | 13.292 | -44.5 +/- 10.5 | -195.8 +/- 37.2 | -38.6 +/- 5.4  |
| cluster6               | -106.5 +/- 5.1  | 18.632 | -30.0 +/- 1.7  | -216.2 +/- 17.0 | -33.3 +/- 4.1  |
| cluster3               | -105.5 +/- 11.2 | 18.164 | -29.5 +/- 1.9  | -220.4 +/- 47.4 | -34.1 +/- 8.6  |
| cluster4               | -80.3 +/- 10.6  | 17.643 | -21.3 +/- 4.0  | -207.7 +/- 51.2 | -20.7 +/- 10.7 |
| cluster5               | -78.7 +/- 11.4  | 14.748 | -23.0 +/- 4.9  | -130.1 +/- 14.9 | -33.1 +/- 9.8  |
